# Supplementary figures and images for: Roles of d-Amino Acids on the Bioactivity of Host Defense Peptides
Source: MDPI journal article supplement (doi:10.3390/ijms17071023), 2016-06-30

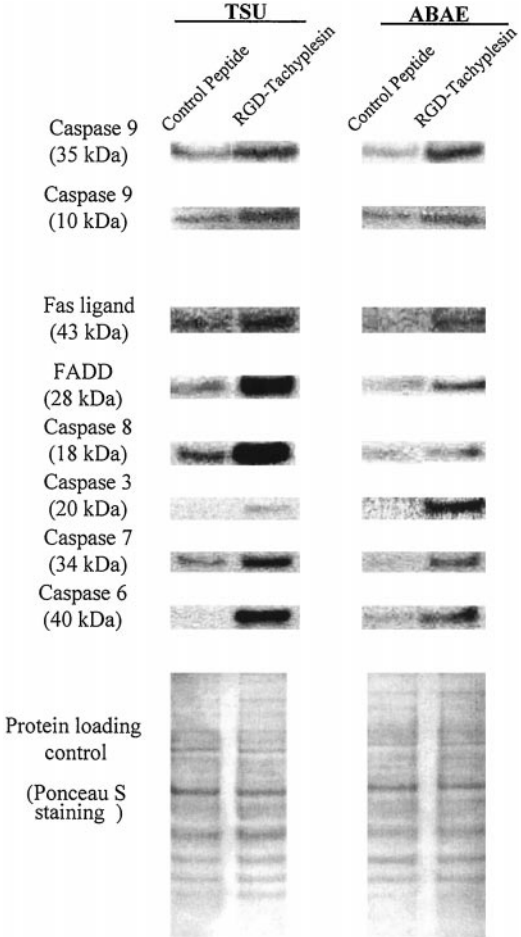

Supplement: s1 [file s1]

**A**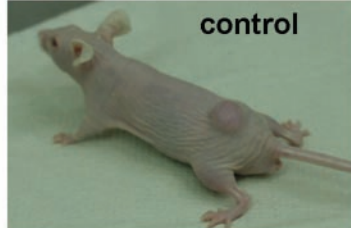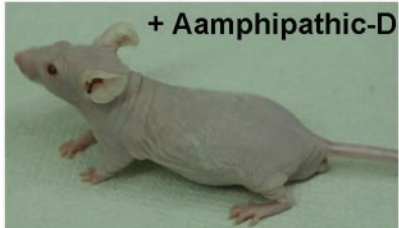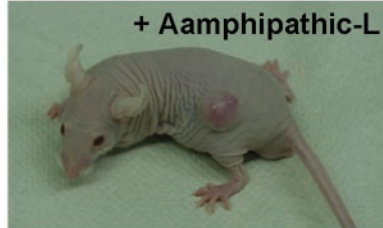**B**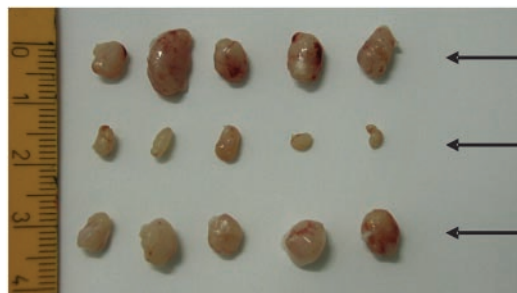

control

+ Aamphipathic-D

+ Aamphipathic-L

**C**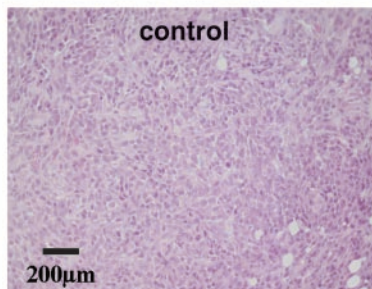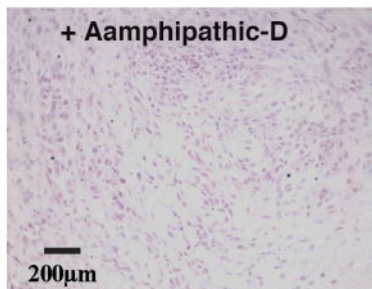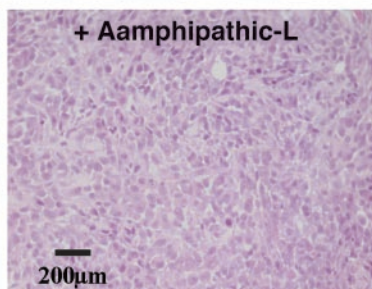

Supplement: s1 [file s1]

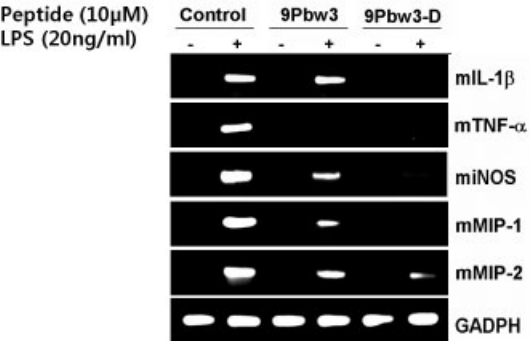

Supplement: s1 [file s1]

**A**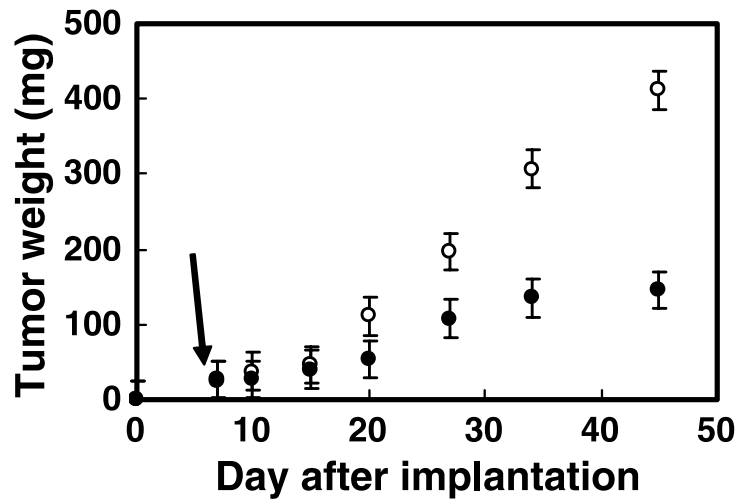**B**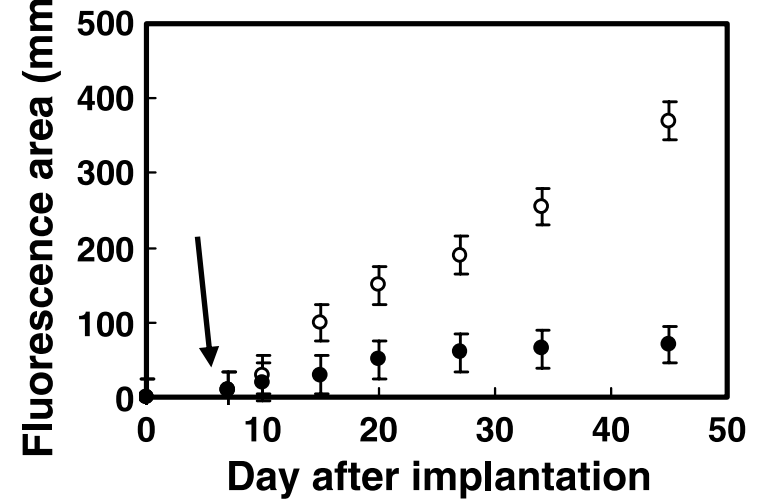**C**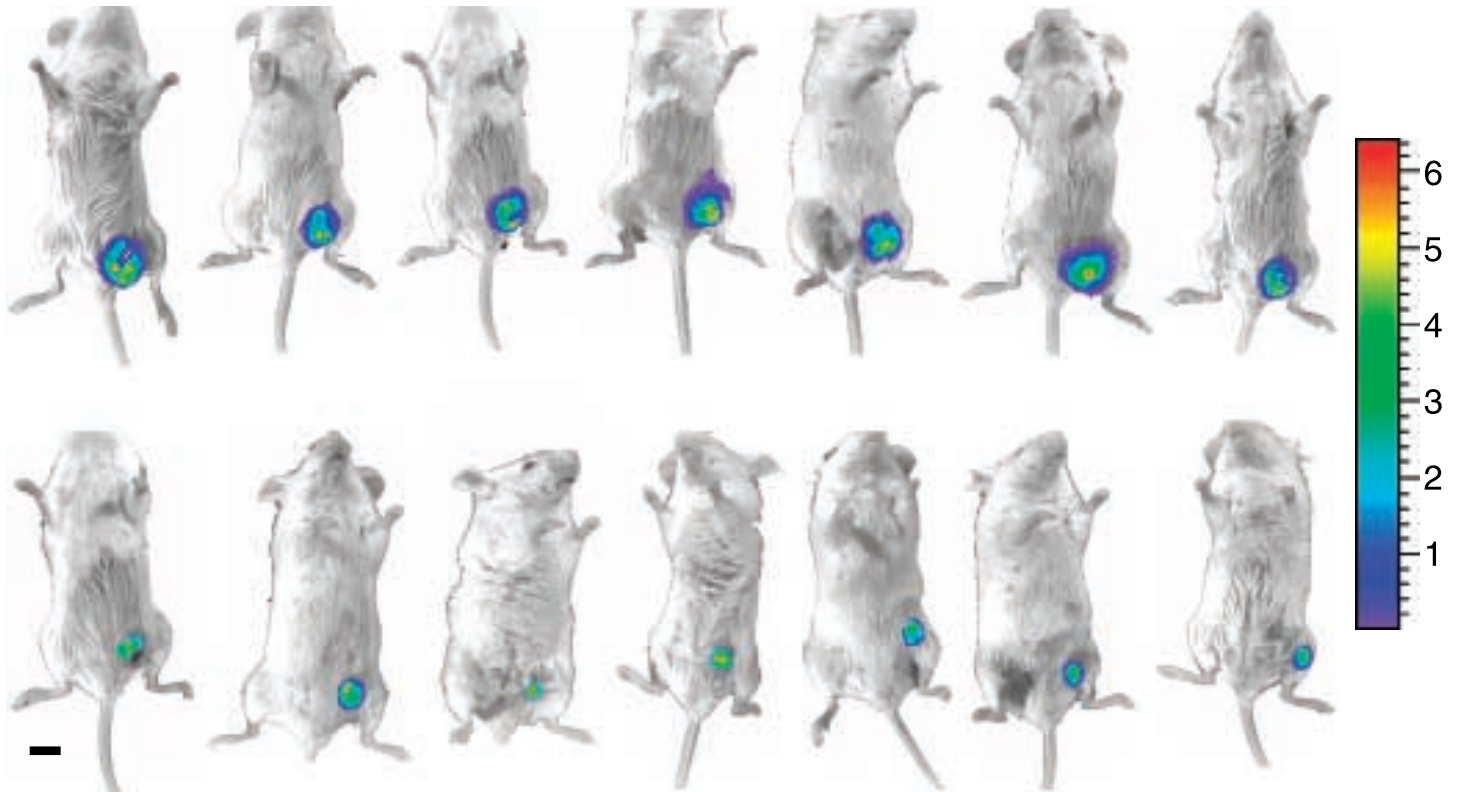**D**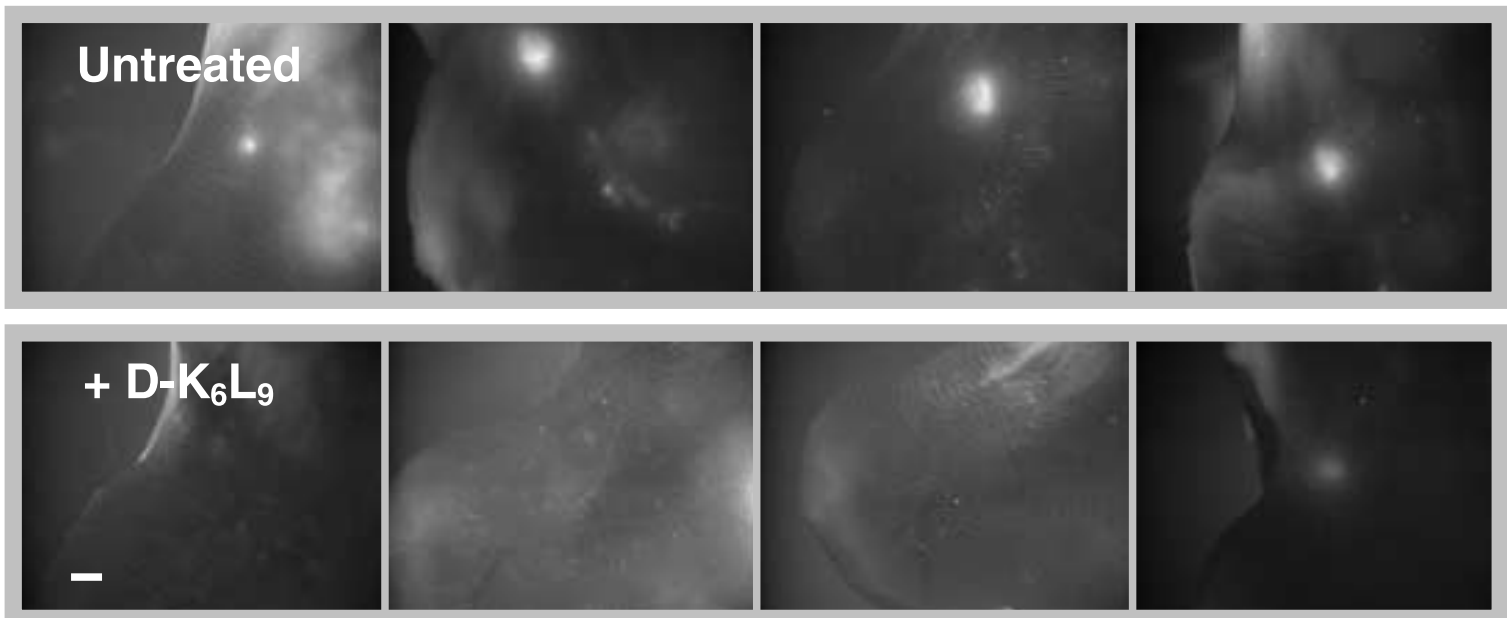

Supplement: s1 [file s1]

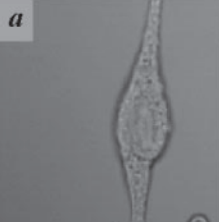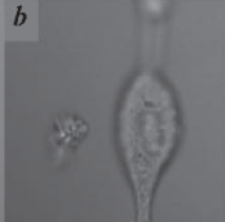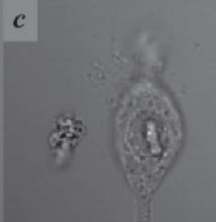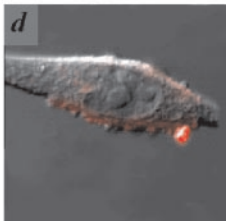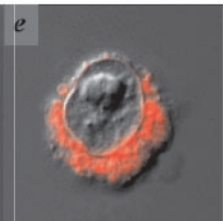

Supplement: s1 [file s1]

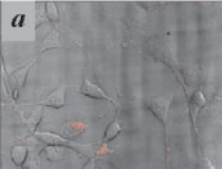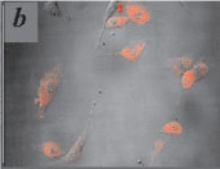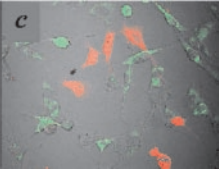

Supplement: s1 [file s1]
